# Supplementary material
Source: Research Square preprint supplement (doi:10.21203/rs.3.rs-8826936/v1)
Supplement: Supplementary file 1 [file 20cdc60269bb07f692e64473.xlsx]

## Sheet: Sheet1
Child ID	Age	Gender	Vocabulary Pre	Vocabulary Post	Cultural Pre	Cultural Post	Retelling Early	Retelling Later
1	3	F	14	16	1.7	3.2	5.4	7.7
2	5	F	12	19	1.9	3.9	2.8	6.3
3	4	M	14	17	1.1	2.5	6.3	7.5
4	3	F	17	17	1	2.7	2.1	5.7
5	5	M	12	17	2.8	3.5	5.1	7.6
6	3	M	12	13	3.3	3.2	7.5	8.2
7	6	M	17	19	2	3.5	2.7	7.5
8	6	F	15	14	3	4	3.4	6.7
9	6	F	11	12	2.4	3.6	4.3	5.9
10	4	M	14	17	1.5	3	3.4	6.9
11	3	M	11	16	2.4	2.8	1.9	4.6
12	6	F	11	15	3.5	3.9	4.3	7.5
13	4	M	13	16	2.1	3.2	2.6	6.8
14	6	F	6	12	3.5	3.7	4.9	6.5
15	6	M	7	10	1	2.1	2.8	6.8
16	6	F	11	13	2.8	4	6.5	8.5
17	4	M	9	13	2.2	4.5	3	6.8
18	4	F	13	19	1.8	3.4	3.7	8.1
19	6	M	9	15	2.2	3.6	5.4	7.3
20	4	F	8	10	1	2.5	2.4	5.1
21	3	F	17	19	1.9	2.2	4.5	6.3
22	5	M	12	15	2.4	3.5	6.2	7.3
23	6	M	13	15	3.4	4.1	1.8	5.3
24	5	F	8	14	1.6	4.5	4.5	7.3
25	5	M	11	17	1.4	2.9	4.6	7.3
26	3	F	13	18	1.6	3.3	5.4	8.2
27	5	M	9	12	2.9	3.8	2.3	5.7
28	6	F	14	16	2.4	2.9	2.2	6.8
29	3	F	10	15	1.6	3.8	5	7
30	5	F	11	17	2.6	4.1	4.6	9.4
