# Supplementary material
Source: Research Square preprint supplement (doi:10.21203/rs.3.rs-8826936/v1)
Supplement: Supplementary file 1 [file 5367b52fd16aeb1b82e37f7f.docx]

**Supplementary File**

**1: Full Interview Guides**

This file provides the complete semi-structured interview guides used in the study. Guides were adapted for each group to keep questions open yet focused on bilingual skills, cultural awareness, challenges, and adaptations. Child interviews were play-based and short to suit the age group.

**Guide for Preschool Children (Ages 3-6, Play-Based)** Use toys, drawings, or puppets to keep things relaxed.

| **Question** | **Main Question** | **Follow-ups/Probes** | **Notes** |
| --- | --- | --- | --- |
| 1 (Warm-up) | What was your favourite part of the story we made with the computer friend? | Why did you like it? Can you draw or show me with a toy? | Start slow to build comfort; note excitement about the AI. |
| 2 (Bilingual Skills) | Did you use both Chinese and English words in the story? Which felt easier or more fun? | Can you tell me one word you used? What happened next? | Watch for natural switches; encourage showing with toys. |
| 3 (Cultural Awareness) | Was there anything in the story from China—like a festival—or from somewhere else? How did that make you feel? | What made that part special? What else would you add? | Note if child mentions or draws cultural parts; probe gently. |
| 4 (Challenges) | Was it easy or a bit hard to talk to the computer friend? What made it fun anyway? | What would you change to make it better next time? Show me! | Listen for issues; keep positive tone. |
| 5 (Closing) | Is there anything else you want to tell me about the stories? | (Praise and small reward) | End warmly; note overall mood. |

**Guide for Teachers** Conducted after sessions.

| **Question** | **Main Question** | **Follow-ups/Probes** | **Notes** |
| --- | --- | --- | --- |
| 1 | How would you describe your experience with the Deepseek sessions overall? | What stood out about engagement or group work? | Set context; note teacher's tone. |
| 2 | How did the sessions seem to affect children's Mandarin and English use? | Any changes by age or gender? Examples? | Link to classroom observations. |
| 3 | What cultural themes came up in the stories, and how did children respond? | Did it help understanding of different cultures? Surprises? | Ask for specific cases. |
| 4 | What practical challenges arose, like devices or attention? | How did you adjust, and what worked? | Include ethics or bias thoughts. |
| 5 | Recommendations for using tools like this in bilingual teaching? | Main benefits and drawbacks? | Summarise and thank. |

**Guide for Parents/Guardians** By phone or in person, focusing on home spillover.

| **Question** | **Main Question** | **Follow-ups/Probes** | **Notes** |
| --- | --- | --- | --- |
| 1 | What has your child told you about the Deepseek activities? | Any changes noticed at home? | Build rapport. |
| 2 | Has it affected how your child uses Mandarin and English daily? | New words or story retellings in play? | Note family language habits. |
| 3 | Has your child mentioned cultural parts from the stories? | How has it shaped views on Chinese or other cultures? | Encourage home examples. |
| 4 | Any difficulties with the tool your child mentioned? | Ideas for improving it at home? | Address access/fairness. |
| 5 | Overall benefits seen for language or culture? | Other thoughts? | Thank and offer updates. |

**2: Assessment Tools and Examples**

**Bilingual Competence Assessment** (Adapted from Peña et al., 2018)

- Vocabulary Naming: 20 picture items (10 prompting Mandarin, 10 English equivalents, e.g., apple/蘋果, dragon/龍). Scored as correct if label matches in requested language.
- Story Retelling: Child retells a 4-picture sequence (neutral theme); scored 0-10 on length, coherence, and language mix.

**Cultural Awareness Rubric** (Researcher-developed, 1-5 scale) 1 = No recognition of diverse elements. 3 = Notices differences (e.g., "different holiday"). 5 = Positive response and connection (e.g., "both fun, share with friends"). Applied to retelling and play extensions.

**Sample Log Excerpts** (Anonymized) Session example: Child input "dragon fly"; AI response blending "The dragon flies high in Chinese sky, with wings like in English tales"; Child follow-up "wings big!"

**3: High-Resolution Figure**


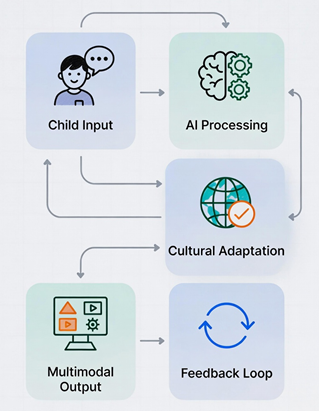


**4. NVivo Coding Steps**

The supplementary file provides full semi-structured interview guides (child, teacher, parent), assessment tools (Vocabulary Naming, Story Retelling, Cultural Awareness Rubric), and sample logs. These directly informed the qualitative coding process. Below is an updated NVivo workflow incorporating these elements (still following Braun & Clarke, 2006 thematic analysis).

**Key Integration:**

- **Interview Guides** → Used as initial code framework. Each main question/probe parent nodes (e.g., Child Guide Q2 → "Bilingual Skills - Natural Mixing").
- **Assessment Tools** → Linked to quantitative nodes; rubric scores cross-referenced with qualitative quotes (e.g., high Cultural Post score + empathy quote).
- **Sample Logs** → Coded as "Session Interaction" nodes (e.g., child input → AI blend → child follow-up).

**Step-by-Step Process in NVivo**

1. **Familiarization**: Imported 30 child play-based interviews, logs (120 sessions), teacher/parent transcripts. Annotated with guide questions (e.g., flagged segments responding to Child Q3 "Cultural Awareness").
2. **Initial Codes**: 90 codes directly tied to guide questions:
   - From Child Guide: "Favourite AI Part" (Q1), "Language Fun/Ease" (Q2), "Cultural Feelings" (Q3), "Interaction Difficulty" (Q4).
   - From Teacher Guide: "Engagement Changes" (Q1), "Mandarin/English Impact" (Q2), "Cultural Response" (Q3).
   - From Parent Guide: "Home Spillover" (Q1-Q3).
   - Log-specific: "AI Blending Response" (e.g., "dragon fly" → bilingual output).
3. **Theme Search**: Grouped into three core themes, with sub-themes enriched by guide probes:

| **Theme** | **Sub-theme** | **Linked Guide Element** | **Example Code from Supplementary** |
| --- | --- | --- | --- |
| Bilingual Competence | Natural code-switching | Child Q2; Teacher Q2 | "Used both words... fun!" |
|  | Vocabulary/Expression Growth | Assessment Vocabulary Naming; Logs | "wings big!" follow-up |
| Cultural Awareness | Blending & Empathy | Child Q3; Parent Q3; Rubric 4-5 | "both fun, share with friends" |
|  | Rooted Curiosity | Teacher Q3 | "Surprises in global links" |
| Challenges & Adaptations | Device/Access Issues | Child Q4; Parent Q4 | "Hard to talk... change next" |
|  | AI Bias/Adjustments | Teacher Q4 | Prompt tweaks noted |

1. **Theme Review**: Matrix queries cross-tabulated codes with 30 child cases (e.g., "Cultural Blending" in 24/30 post-sessions).
2. **Define & Name**: Finalized with rubric alignment (e.g., Rubric Level 5 quotes coded under "Positive Connection").

**5. Individual Data**

Child 1: Age 3, Gender Female, Vocabulary Pre-test 14, Vocabulary Post-test 16, Cultural Awareness Pre-test 1.7, Cultural Awareness Post-test 3.2, Story Retelling Early 5.4, Story Retelling Later 7.7

Child 2: Age 5, Gender Female, Vocabulary Pre-test 12, Vocabulary Post-test 19, Cultural Awareness Pre-test 1.9, Cultural Awareness Post-test 3.9, Story Retelling Early 2.8, Story Retelling Later 6.3

Child 3: Age 4, Gender Male, Vocabulary Pre-test 14, Vocabulary Post-test 17, Cultural Awareness Pre-test 1.1, Cultural Awareness Post-test 2.5, Story Retelling Early 6.3, Story Retelling Later 7.5

Child 4: Age 3, Gender Female, Vocabulary Pre-test 17, Vocabulary Post-test 17, Cultural Awareness Pre-test 1.0, Cultural Awareness Post-test 2.7, Story Retelling Early 2.1, Story Retelling Later 5.7

Child 5: Age 5, Gender Male, Vocabulary Pre-test 12, Vocabulary Post-test 17, Cultural Awareness Pre-test 2.8, Cultural Awareness Post-test 3.5, Story Retelling Early 5.1, Story Retelling Later 7.6

Child 6: Age 3, Gender Male, Vocabulary Pre-test 12, Vocabulary Post-test 13, Cultural Awareness Pre-test 3.3, Cultural Awareness Post-test 3.2, Story Retelling Early 7.5, Story Retelling Later 8.2

Child 7: Age 6, Gender Male, Vocabulary Pre-test 17, Vocabulary Post-test 19, Cultural Awareness Pre-test 2.0, Cultural Awareness Post-test 3.5, Story Retelling Early 2.7, Story Retelling Later 7.5

Child 8: Age 6, Gender Female, Vocabulary Pre-test 15, Vocabulary Post-test 14, Cultural Awareness Pre-test 3.0, Cultural Awareness Post-test 4.0, Story Retelling Early 3.4, Story Retelling Later 6.7

Child 9: Age 6, Gender Female, Vocabulary Pre-test 11, Vocabulary Post-test 12, Cultural Awareness Pre-test 2.4, Cultural Awareness Post-test 3.6, Story Retelling Early 4.3, Story Retelling Later 5.9

Child 10: Age 4, Gender Male, Vocabulary Pre-test 14, Vocabulary Post-test 17, Cultural Awareness Pre-test 1.5, Cultural Awareness Post-test 3.0, Story Retelling Early 3.4, Story Retelling Later 6.9

Child 11: Age 3, Gender Male, Vocabulary Pre-test 11, Vocabulary Post-test 16, Cultural Awareness Pre-test 2.4, Cultural Awareness Post-test 2.8, Story Retelling Early 1.9, Story Retelling Later 4.6

Child 12: Age 6, Gender Female, Vocabulary Pre-test 11, Vocabulary Post-test 15, Cultural Awareness Pre-test 3.5, Cultural Awareness Post-test 3.9, Story Retelling Early 4.3, Story Retelling Later 7.5

Child 13: Age 4, Gender Male, Vocabulary Pre-test 13, Vocabulary Post-test 16, Cultural Awareness Pre-test 2.1, Cultural Awareness Post-test 3.2, Story Retelling Early 2.6, Story Retelling Later 6.8

Child 14: Age 6, Gender Female, Vocabulary Pre-test 6, Vocabulary Post-test 12, Cultural Awareness Pre-test 3.5, Cultural Awareness Post-test 3.7, Story Retelling Early 4.9, Story Retelling Later 6.5

Child 15: Age 6, Gender Male, Vocabulary Pre-test 7, Vocabulary Post-test 10, Cultural Awareness Pre-test 1.0, Cultural Awareness Post-test 2.1, Story Retelling Early 2.8, Story Retelling Later 6.8

Child 16: Age 6, Gender Female, Vocabulary Pre-test 11, Vocabulary Post-test 13, Cultural Awareness Pre-test 2.8, Cultural Awareness Post-test 4.0, Story Retelling Early 6.5, Story Retelling Later 8.5

Child 17: Age 4, Gender Male, Vocabulary Pre-test 9, Vocabulary Post-test 13, Cultural Awareness Pre-test 2.2, Cultural Awareness Post-test 4.5, Story Retelling Early 3.0, Story Retelling Later 6.8

Child 18: Age 4, Gender Female, Vocabulary Pre-test 13, Vocabulary Post-test 19, Cultural Awareness Pre-test 1.8, Cultural Awareness Post-test 3.4, Story Retelling Early 3.7, Story Retelling Later 8.1

Child 19: Age 6, Gender Male, Vocabulary Pre-test 9, Vocabulary Post-test 15, Cultural Awareness Pre-test 2.2, Cultural Awareness Post-test 3.6, Story Retelling Early 5.4, Story Retelling Later 7.3

Child 20: Age 4, Gender Female, Vocabulary Pre-test 8, Vocabulary Post-test 10, Cultural Awareness Pre-test 1.0, Cultural Awareness Post-test 2.5, Story Retelling Early 2.4, Story Retelling Later 5.1

Child 21: Age 3, Gender Female, Vocabulary Pre-test 17, Vocabulary Post-test 19, Cultural Awareness Pre-test 1.9, Cultural Awareness Post-test 2.2, Story Retelling Early 4.5, Story Retelling Later 6.3

Child 22: Age 5, Gender Male, Vocabulary Pre-test 12, Vocabulary Post-test 15, Cultural Awareness Pre-test 2.4, Cultural Awareness Post-test 3.5, Story Retelling Early 6.2, Story Retelling Later 7.3

Child 23: Age 6, Gender Male, Vocabulary Pre-test 13, Vocabulary Post-test 15, Cultural Awareness Pre-test 3.4, Cultural Awareness Post-test 4.1, Story Retelling Early 1.8, Story Retelling Later 5.3

Child 24: Age 5, Gender Female, Vocabulary Pre-test 8, Vocabulary Post-test 14, Cultural Awareness Pre-test 1.6, Cultural Awareness Post-test 4.5, Story Retelling Early 4.5, Story Retelling Later 7.3

Child 25: Age 5, Gender Male, Vocabulary Pre-test 11, Vocabulary Post-test 17, Cultural Awareness Pre-test 1.4, Cultural Awareness Post-test 2.9, Story Retelling Early 4.6, Story Retelling Later 7.3

Child 26: Age 3, Gender Female, Vocabulary Pre-test 13, Vocabulary Post-test 18, Cultural Awareness Pre-test 1.6, Cultural Awareness Post-test 3.3, Story Retelling Early 5.4, Story Retelling Later 8.2

Child 27: Age 5, Gender Male, Vocabulary Pre-test 9, Vocabulary Post-test 12, Cultural Awareness Pre-test 2.9, Cultural Awareness Post-test 3.8, Story Retelling Early 2.3, Story Retelling Later 5.7

Child 28: Age 6, Gender Female, Vocabulary Pre-test 14, Vocabulary Post-test 16, Cultural Awareness Pre-test 2.4, Cultural Awareness Post-test 2.9, Story Retelling Early 2.2, Story Retelling Later 6.8

Child 29: Age 3, Gender Female, Vocabulary Pre-test 10, Vocabulary Post-test 15, Cultural Awareness Pre-test 1.6, Cultural Awareness Post-test 3.8, Story Retelling Early 5.0, Story Retelling Later 7.0

Child 30: Age 5, Gender Female, Vocabulary Pre-test 11, Vocabulary Post-test 17, Cultural Awareness Pre-test 2.6, Cultural Awareness Post-test 4.1, Story Retelling Early 4.6, Story Retelling Later 9.4

Verification Summary

Vocabulary Pre-test: Mean = 11.8, Standard Deviation approximately 2.83

Vocabulary Post-test: Mean = 15.27, Standard Deviation approximately 2.56 (approximately 29% gain)

Cultural Awareness Pre-test: Mean approximately 2.17, Standard Deviation approximately 0.76

Cultural Awareness Post-test: Mean approximately 3.40, Standard Deviation approximately 0.63

Story Retelling Early: Mean approximately 4.05, Standard Deviation approximately 1.54

Story Retelling Later: Mean approximately 6.95, Standard Deviation approximately 1.06
